# Supplementary material for: Variations in Antibiotic Use and Sepsis Management in Neonatal Intensive Care Units: A European Survey
Source: MDPI journal article supplement (doi:10.3390/antibiotics10091046), 2021-08-27
Supplement: s1 [file Suppl S1.pdf › Suppl S1.pdf]

| <b>Supplemental material S1: List of countries with 6 or less responses to the survey.</b> |                                |
|--------------------------------------------------------------------------------------------|--------------------------------|
| <b>Country</b>                                                                             | <b>Number of responses (n)</b> |
| Albania                                                                                    | 1                              |
| Austria                                                                                    | 6                              |
| Belarus                                                                                    | 1                              |
| Bosnia and Herzegovina                                                                     | 2                              |
| Croatia                                                                                    | 1                              |
| Cyprus                                                                                     | 1                              |
| Estonia                                                                                    | 5                              |
| Finland                                                                                    | 3                              |
| Hungary                                                                                    | 4                              |
| Iceland                                                                                    | 1                              |
| Ireland                                                                                    | 3                              |
| Latvia                                                                                     | 2                              |
| Lithuania                                                                                  | 2                              |
| Montenegro                                                                                 | 1                              |
| North Macedonia                                                                            | 1                              |
| Norway                                                                                     | 3                              |
| Romania                                                                                    | 5                              |
| Serbia                                                                                     | 1                              |
| Slovakia                                                                                   | 1                              |
| Slovenia                                                                                   | 1                              |
| Switzerland                                                                                | 5                              |
