# Supplementary material for: Variations in Antibiotic Use and Sepsis Management in Neonatal Intensive Care Units: A European Survey
Source: MDPI journal article supplement (doi:10.3390/antibiotics10091046), 2021-08-27
Supplement: s1 [file Suppl S2.pdf › Suppl S2.pdf]

**Supplemental material S2: Antibiotic combinations in early-onset sepsis, late-onset sepsis, and necrotizing enterocolitis.**

| <i>EARLY ONSET SEPSIS</i>       | <b>Number of responses (n)</b> | <b>Percent (%)</b> |
|---------------------------------|--------------------------------|--------------------|
| AMPI/GENT                       | 148                            | 54.61              |
| PEN/GENT                        | 47                             | 17.34              |
| AMPI/AMIKA                      | 28                             | 10.33              |
| AMPI                            | 8                              | 2.95               |
| PEN/AMIKA                       | 7                              | 2.58               |
| AMPI/TOBRA                      | 5                              | 1.85               |
| AMPI/GENT/AMIKA                 | 3                              | 1.11               |
| GENT/CEFOTA                     | 3                              | 1.11               |
| AMOXI/GENT                      | 2                              | 0.74               |
| AMPI/AMIKA/CEFTA                | 2                              | 0.74               |
| AMPI/CEFOTA                     | 2                              | 0.74               |
| AMPI/NETIL                      | 2                              | 0.74               |
| PEN/AMPI/GENT                   | 2                              | 0.74               |
| AMIKA/MEROPENEM                 | 1                              | 0.37               |
| AMIKA/PIPE_TAZO                 | 1                              | 0.37               |
| AMOXI/AMIKA                     | 1                              | 0.37               |
| AMPI/CEFURO                     | 1                              | 0.37               |
| AMPI/GENT/CEFOTA                | 1                              | 0.37               |
| GENT/PIPE_TAZO                  | 1                              | 0.37               |
| MEROPENEM/VANCO                 | 1                              | 0.37               |
| PEN/AMIKA/CEFOTA                | 1                              | 0.37               |
| PEN/AMINA                       | 1                              | 0.37               |
| PEN/AMPI/CEFOTA                 | 1                              | 0.37               |
| PEN/NETIL                       | 1                              | 0.37               |
| PEN/TOBRA                       | 1                              | 0.37               |
| Total                           | 271                            | 100.00             |
|                                 |                                |                    |
| <i>LATE ONSET SEPSIS</i>        | <b>Number of responses (n)</b> | <b>Percent (%)</b> |
| AMIKA/VANCO                     | 29                             | 10.70              |
| CEFOTA/VANCO                    | 22                             | 8.12               |
| MEROPENEM/VANCO                 | 21                             | 7.75               |
| AMPI/GENT                       | 16                             | 5.90               |
| GENT/FLUCLO                     | 13                             | 4.80               |
| GENT/VANCO                      | 12                             | 4.43               |
| GENT/CEFOTA/VANCO               | 10                             | 3.69               |
| PIPE_TAZO                       | 8                              | 2.95               |
| AMIKA/FLUCLO                    | 7                              | 2.58               |
| AMIKA/OXACILLIN                 | 7                              | 2.58               |
| AMPI/CEFOTA                     | 7                              | 2.58               |
| AMIKA                           | 6                              | 2.21               |
| AMIKA/CEFOTA                    | 6                              | 2.21               |
| VANCO/PIPE_TAZO                 | 6                              | 2.21               |
| AMIKA/CEFOTA/VANCO              | 5                              | 1.85               |
| AMPI/GENT/CEFOTA                | 5                              | 1.85               |
| CEFTA/VANCO                     | 5                              | 1.85               |
| GENT/CEFOTA                     | 5                              | 1.85               |
| PEN/GENT                        | 5                              | 1.85               |
| AMIKA/TEICO                     | 4                              | 1.48               |
| GENT/OXACILLIN                  | 4                              | 1.48               |
| AMPI/AMIKA                      | 3                              | 1.11               |
| GENT/PIPE_TAZO                  | 3                              | 1.11               |
| PEN/GENT/PIPE_TAZO              | 3                              | 1.11               |
| VANCO                           | 3                              | 1.11               |
| AMIKA/MEROPENEM                 | 2                              | 0.74               |
| AMIKA/MEROPENEM/VANCO/PIPE_TAZO | 2                              | 0.74               |

|                                                 |                                |                    |
|-------------------------------------------------|--------------------------------|--------------------|
| AMIKA/PIPE_TAZO                                 | 2                              | 0.74               |
| AMPI/CEFOTA/VANCO                               | 2                              | 0.74               |
| CEFOTA                                          | 2                              | 0.74               |
| GENT/CEFTA/VANCO                                | 2                              | 0.74               |
| GENT/VANCO/PIPE_TAZO                            | 2                              | 0.74               |
| MEROPENEM                                       | 2                              | 0.74               |
| MEROPENEM/VANCO/PIPE_TAZO                       | 2                              | 0.74               |
| TEICO                                           | 2                              | 0.74               |
| AMIKA/CEFOPERAZONA                              | 1                              | 0.37               |
| AMIKA/CEFOTA/CEFTA/PIPE_TAZO                    | 1                              | 0.37               |
| AMIKA/CEFOTA/CEFTA/VANCO/PIPE_TAZO              | 1                              | 0.37               |
| AMIKA/CEFTA                                     | 1                              | 0.37               |
| AMIKA/CEFTA/VANCO                               | 1                              | 0.37               |
| AMIKA/GENT/PIPE_TAZO                            | 1                              | 0.37               |
| AMIKA/MEROPENEM/VANCO                           | 1                              | 0.37               |
| AMIKA/VANCO/FLUCLO                              | 1                              | 0.37               |
| AMIKA/VANCO/PIPE_TAZO                           | 1                              | 0.37               |
| AMIKA/VANCO/PIP_TAZO                            | 1                              | 0.37               |
| AMPI/AMIKA/CEFOTA/MEROPENEM/VANCO               | 1                              | 0.37               |
| AMPI/AMIKA/CEFTA/MEROPENEM/VANCO/ METRONIDAZOLE | 1                              | 0.37               |
| AMPI/GENT/CEFTA                                 | 1                              | 0.37               |
| AMPI/GENT/MEROPENEM/VANCO/FLUCLO                | 1                              | 0.37               |
| AMPI_SULBAC/GENT                                | 1                              | 0.37               |
| AMPI_SULBAC/VANCO                               | 1                              | 0.37               |
| CEFOTA/FLUCLO                                   | 1                              | 0.37               |
| CEFOTA/MEROPENEM                                | 1                              | 0.37               |
| CEFOTA/TEICO                                    | 1                              | 0.37               |
| CEFOTA/VANCO/PIPE_TAZO                          | 1                              | 0.37               |
| CEFTA/FLUCLO                                    | 1                              | 0.37               |
| CEFTA/MEROPENEM                                 | 1                              | 0.37               |
| CEFTA/TEICO                                     | 1                              | 0.37               |
| GENT                                            | 1                              | 0.37               |
| GENT/AMIKA/MEROPENEM/VANCO                      | 1                              | 0.37               |
| GENT/CEFOTA/MEROPENEM/PIPE_TAZO                 | 1                              | 0.37               |
| GENT/CEFOTA/MEROPENEM/VANCO                     | 1                              | 0.37               |
| GENT/CEFOTA/VANCO/PIPE_TAZO                     | 1                              | 0.37               |
| GENT/MEROPENEM                                  | 1                              | 0.37               |
| GENT/MEROPENEM/VANCO                            | 1                              | 0.37               |
| GENT/TEICO                                      | 1                              | 0.37               |
| IMIPENEM                                        | 1                              | 0.37               |
| PEN/NETIL                                       | 1                              | 0.37               |
| TOBRA/CEFOTA                                    | 1                              | 0.37               |
| TOBRA/CEFUROXIME                                | 1                              | 0.37               |
| VANCO/FLUCLO                                    | 1                              | 0.37               |
| Total                                           | 271                            | 100.00             |
| <b>NECROTIZING ENTEROCOLITIS</b>                |                                |                    |
|                                                 | <b>Number of responses (n)</b> | <b>Percent (%)</b> |
| AMPI/GENT/METRONIDAZOLE                         | 27                             | 10.00              |
| MEROPENEM/VANCO                                 | 25                             | 9.26               |
| AMPI/GENT                                       | 12                             | 4.44               |
| MEROPENEM/VANCO/METRONIDAZOLE                   | 10                             | 3.70               |
| MEROPENEM                                       | 9                              | 3.33               |
| AMIKA/PIPE_TAZO                                 | 8                              | 2.96               |
| AMIKA/VANCO/METRONIDAZOLE                       | 8                              | 2.96               |
| CEFOTA/VANCO/METRONIDAZOLE                      | 8                              | 2.96               |
| METRONIDAZOLE                                   | 8                              | 2.96               |
| PIPE_TAZO                                       | 8                              | 2.96               |
| GENT/AMOXICLAV                                  | 7                              | 2.59               |
| VANCO/PIPE_TAZO                                 | 7                              | 2.59               |
| GENT/PIPE_TAZO                                  | 6                              | 2.22               |

|                                           |   |      |
|-------------------------------------------|---|------|
| AMIKA/CEFOTA/METRONIDAZOLE                | 5 | 1.85 |
| AMIKA/CEFOTA/VANCO/METRONIDAZOLE          | 5 | 1.85 |
| GENT/CEFOTA/VANCO/METRONIDAZOLE           | 5 | 1.85 |
| PEN/GENT/METRONIDAZOLE                    | 5 | 1.85 |
| AMIKA/VANCO/PIPE_TAZO                     | 4 | 1.48 |
| AMPI/AMIKA/METRONIDAZOLE                  | 4 | 1.48 |
| GENT/VANCO/METRONIDAZOLE                  | 4 | 1.48 |
| MEROPENEM/METRONIDAZOLE                   | 4 | 1.48 |
| AMIKA/AMOXICLAV                           | 3 | 1.11 |
| AMIKA/GENT/METRONIDAZOLE                  | 3 | 1.11 |
| AMIKA/VANCO                               | 3 | 1.11 |
| CEFOTA/METRONIDAZOLE                      | 3 | 1.11 |
| CEFOTA/VANCO                              | 3 | 1.11 |
| CEFTA/METRONIDAZOLE                       | 3 | 1.11 |
| CEFTA/VANCO/METRONIDAZOLE                 | 3 | 1.11 |
| GENT/CEFOTA/METRONIDAZOLE                 | 3 | 1.11 |
| METRONIDAZOLE/PIPE_TAZO                   | 3 | 1.11 |
| AMIKA/CEFOTA                              | 2 | 0.74 |
| AMIKA/MEROPENEM/METRONIDAZOLE             | 2 | 0.74 |
| AMIKA/METRONIDAZOLE                       | 2 | 0.74 |
| AMIKA/METRONIDAZOLE/PIPE_TAZO             | 2 | 0.74 |
| AMPI/GENT/CEFOTA                          | 2 | 0.74 |
| AMPI/MEROPENEM                            | 2 | 0.74 |
| GENT/CEFOTA/VANCO                         | 2 | 0.74 |
| GENT/METRONIDAZOLE/PIPE_TAZO              | 2 | 0.74 |
| GENT/VANCO/PIPE_TAZO                      | 2 | 0.74 |
| MEROPENEM/TEICO                           | 2 | 0.74 |
| VANCO/METRONIDAZOLE/PIPE_TAZO             | 2 | 0.74 |
| AMIKA/CEFTA/MEROPENEM/METRONIDAZOLE       | 1 | 0.37 |
| AMIKA/CEFTA/METRONIDAZOLE                 | 1 | 0.37 |
| AMIKA/CEFTA/ORNIDAZOLE                    | 1 | 0.37 |
| AMIKA/CEFTA/TEICO                         | 1 | 0.37 |
| AMIKA/MEROPENEM                           | 1 | 0.37 |
| AMIKA/METRONIDAZOLE/FLUCLO                | 1 | 0.37 |
| AMIKA/METRONIDAZOLE/TEICO                 | 1 | 0.37 |
| AMPI                                      | 1 | 0.37 |
| AMPI/AMIKA                                | 1 | 0.37 |
| AMPI/GENT/METRONIDAZOLE                   | 1 | 0.37 |
| AMPI/GENT/CEFOTA/METRONIDAZOLE            | 1 | 0.37 |
| AMPI/GENT/CEFOTA/VANCO/METRONIDAZOLE      | 1 | 0.37 |
| AMPI/GENT/CLINDA                          | 1 | 0.37 |
| AMPI/TOBRA/METRONIDAZOLE                  | 1 | 0.37 |
| CEFOPERAZONE/AMIKA/METRONIDAZOLE          | 1 | 0.37 |
| CEFOPERAZONE/VANCO                        | 1 | 0.37 |
| CEFOTA/MEROPENEM                          | 1 | 0.37 |
| CEFOTA/VANCO/ORNIDAZOLE                   | 1 | 0.37 |
| CEFTA/METRONIDAZOLE/TEICO                 | 1 | 0.37 |
| CEFTA/VANCO                               | 1 | 0.37 |
| GENT/AMIKA/MEROPENEM                      | 1 | 0.37 |
| GENT/AMIKA/VANCO                          | 1 | 0.37 |
| GENT/AMPI                                 | 1 | 0.37 |
| GENT/AMPI_SULBACTAM                       | 1 | 0.37 |
| GENT/CEFOTA/MEROPENEM/VANCO/METRONIDAZOLE | 1 | 0.37 |
| GENT/CEFTA/VANCO/METRONIDAZOLE            | 1 | 0.37 |
| GENT/MEROPENEM                            | 1 | 0.37 |
| GENT/MEROPENEM/VANCO                      | 1 | 0.37 |
| GENT/METRONIDAZOLE                        | 1 | 0.37 |
| GENT/METRONIDAZOLE/FLUCLO                 | 1 | 0.37 |
| GENT/METRONIDAZOLE/TEICO                  | 1 | 0.37 |
| GENT/VANCO/PIPE_TAZO                      | 1 | 0.37 |
| GENT/VANCO                                | 1 | 0.37 |
| MEROPENEM/VANCO                           | 1 | 0.37 |

|                                                                                                                                                                                                                                                                                                                        |     |        |
|------------------------------------------------------------------------------------------------------------------------------------------------------------------------------------------------------------------------------------------------------------------------------------------------------------------------|-----|--------|
| MEROPENEM/VANCO/METRONIDAZOLE/PIPE_TAZO                                                                                                                                                                                                                                                                                | 1   | 0.37   |
| METRONIDAZOLE/CLINDAMYCIN                                                                                                                                                                                                                                                                                              | 1   | 0.37   |
| PEN/AMPI/METRONIDAZOLE                                                                                                                                                                                                                                                                                                 | 1   | 0.37   |
| TOBRA/CEFTA/VANCO/METRONIDAZOLE                                                                                                                                                                                                                                                                                        | 1   | 0.37   |
| TOBRA/MEROPENEM/METRONIDAZOLE                                                                                                                                                                                                                                                                                          | 1   | 0.37   |
| TOBRA/PIPE_TAZO                                                                                                                                                                                                                                                                                                        | 1   | 0.37   |
| VANCO/METRONIDAZOLE                                                                                                                                                                                                                                                                                                    | 1   | 0.37   |
| VANCO/NETILMICIN/METRONIDAZOLE                                                                                                                                                                                                                                                                                         | 1   | 0.37   |
| Total                                                                                                                                                                                                                                                                                                                  | 270 | 100.00 |
| AMIKA: amikacin; AMPI: ampicillin; CEFOTA: cefotaxime; CEFTA: ceftazidime; FLUCLO: flucloxacillin;<br>GENT: gentamicin; MEROPENEM: meropenem; METRONIDAZOLE: metronidazole; OXACILLIN:<br>oxacillin; PEN: penicillin; PIPE_TAZO: piperacillin-tazobactam; TEICO: teicoplanin; TOBRA: tobramycin;<br>VANCO: vancomycin. |     |        |
