# Supplementary material for: Variations in Antibiotic Use and Sepsis Management in Neonatal Intensive Care Units: A European Survey
Source: MDPI journal article supplement (doi:10.3390/antibiotics10091046), 2021-08-27
Supplement: s1 [file Suppl S3.pdf › Suppl S3.pdf]

**Supplemental material S3: Biological markers and laboratory tests used to diagnose neonatal sepsis and decide to suspend antibiotic treatment.**

**A. Start Antibiotics**

| Tests                    | Number of responses | Percent (%)  |
|--------------------------|---------------------|--------------|
| CRP/BC                   | 72                  | 26,6         |
| CRP/PRO/BC               | 66                  | 24,4         |
| CRP/PRO/PCR/BC           | 18                  | 6,6          |
| CRP/BC/FBC               | 15                  | 5,5          |
| CRP/CYTO/BC              | 11                  | 4,1          |
| CRP/PCR/BC               | 10                  | 3,7          |
| CRP/PRO                  | 8                   | 3,0          |
| CRP/PRO/CYTO/BC          | 7                   | 2,6          |
| CRP/BC/HERO              | 6                   | 2,2          |
| CRP/PRO/BC/FBC           | 5                   | 1,8          |
| CRP/PRO/BC/HERO          | 5                   | 1,8          |
| BC                       | 4                   | 1,5          |
| CRP/PRO/DNA/BC           | 4                   | 1,5          |
| CRP/CYTO                 | 3                   | 1,1          |
| CRP/CYTO/PCR/BC          | 3                   | 1,1          |
| CRP/PRO/CYTO/PCR/BC      | 3                   | 1,1          |
| CRP                      | 2                   | 0,7          |
| CRP/BC/HERO/FBC          | 2                   | 0,7          |
| CRP/CYTO/PCR/DNA/BC      | 2                   | 0,7          |
| CRP/FBC                  | 2                   | 0,7          |
| CRP/PRO/BC/HERO/FBC      | 2                   | 0,7          |
| CRP/PRO/CYTO/PCR/BC/HERO | 2                   | 0,7          |
| CRP/PRO/PCR              | 2                   | 0,7          |
| CRP/PRO/PCR/BC/FBC       | 2                   | 0,7          |
| CRP/PRO/PCR/DNA/BC       | 2                   | 0,7          |
| CEP/PRO/BC               | 1                   | 0,4          |
| CRP/CYTO/BC/FBC          | 1                   | 0,4          |
| CRP/CYTO/DNA/BC          | 1                   | 0,4          |
| CRP/DNA/BC/HERO          | 1                   | 0,4          |
| CRP/PCR/BC/FBC           | 1                   | 0,4          |
| CRP/PRO/BC/FBC/CSF/UC    | 1                   | 0,4          |
| CRP/PRO/CYTO/BC/HERO     | 1                   | 0,4          |
| CRP/PRO/CYTO/DNA/BC      | 1                   | 0,4          |
| CRP/PRO/CYTO/DNA/BC/HERO | 1                   | 0,4          |
| CRP/PRO/FBC              | 1                   | 0,4          |
| PCR/BC                   | 1                   | 0,4          |
| PRO/BC                   | 1                   | 0,4          |
| PRO/BC/FBC               | 1                   | 0,4          |
| <b>Total</b>             | <b>271</b>          | <b>100,0</b> |

**B. Stop Antibiotics**

| Tests               | Number of responses | Percent (%)  |
|---------------------|---------------------|--------------|
| CRP/BC              | 112                 | 41,3         |
| CRP/PRO/BC          | 36                  | 13,3         |
| CRP                 | 32                  | 11,8         |
| BC                  | 22                  | 8,1          |
| CRP/PRO             | 17                  | 6,3          |
| CRP/PCR/BC          | 7                   | 2,6          |
| CRP/BC/FBC          | 6                   | 2,2          |
| CRP/FBC             | 3                   | 1,1          |
| CRP/PRO/BC/HERO     | 3                   | 1,1          |
| NONE                | 3                   | 1,1          |
| PRO/BC              | 3                   | 1,1          |
| CRP/BC/HERO         | 2                   | 0,7          |
| CRP/CYTO            | 2                   | 0,7          |
| CRP/PRO/BC/FBC      | 2                   | 0,7          |
| CRP/PRO/BC/HERO/FBC | 2                   | 0,7          |
| CRP/PRO/CYTO/BC     | 2                   | 0,7          |
| CRP/PRO/DNA/BC      | 2                   | 0,7          |
| CRP/PRO/PCR         | 2                   | 0,7          |
| CRP/PRO/PCR/BC      | 2                   | 0,7          |
| PCR/DNA/BC          | 2                   | 0,7          |
| CRP/CYTO/BC         | 1                   | 0,4          |
| CRP/CYTO/FBC        | 1                   | 0,4          |
| CRP/CYTO/PCR/BC     | 1                   | 0,4          |
| CRP/DNA/BC/HERO     | 1                   | 0,4          |
| CRP/PRO/FBC         | 1                   | 0,4          |
| CRP/PRO/PCR/DNA/BC  | 1                   | 0,4          |
| PCR/BC              | 1                   | 0,4          |
| PRO                 | 1                   | 0,4          |
| PRO/CYTO/HERO       | 1                   | 0,4          |
| <b>Total</b>        | <b>271</b>          | <b>100,0</b> |

BC: blood cultures; CRP: C reactive protein; CYTO: cytokines; DNA: DNA microarray-based methods; FBC: full blood count; HERO: HeRo monitoring; PCR: PCR based methods; PRO: procalcitonin.
