# Supplementary material for: Variations in Antibiotic Use and Sepsis Management in Neonatal Intensive Care Units: A European Survey
Source: MDPI journal article supplement (doi:10.3390/antibiotics10091046), 2021-08-27
Supplement: s1 [file Suppl S4.pdf › Suppl S4.pdf]

| <b>Supplemental material S4. Maternal policy screening for Group B Streptococcus (GBS)</b>                                                           |                                |                    |
|------------------------------------------------------------------------------------------------------------------------------------------------------|--------------------------------|--------------------|
| A. Does your hospital screen ALL mothers for Group B Streptococcus (GBS) colonization at 35-37 weeks of gestation?: <b>NO</b>                        |                                |                    |
| <b>Country</b>                                                                                                                                       | <b>Number of responses (n)</b> | <b>Percent (%)</b> |
| Turkey                                                                                                                                               | 8                              | 16,0               |
| Netherlands                                                                                                                                          | 6                              | 12,0               |
| Germany                                                                                                                                              | 5                              | 10,0               |
| Sweden                                                                                                                                               | 5                              | 10,0               |
| Denmark                                                                                                                                              | 4                              | 8,0                |
| Israel                                                                                                                                               | 4                              | 8,0                |
| Russia                                                                                                                                               | 4                              | 8,0                |
| United Kingdom                                                                                                                                       | 3                              | 6,0                |
| Greece                                                                                                                                               | 2                              | 4,0                |
| Ireland                                                                                                                                              | 2                              | 4,0                |
| Austria                                                                                                                                              | 1                              | 2,0                |
| Czech Republic                                                                                                                                       | 1                              | 2,0                |
| Finland                                                                                                                                              | 1                              | 2,0                |
| France                                                                                                                                               | 1                              | 2,0                |
| Iceland                                                                                                                                              | 1                              | 2,0                |
| Poland                                                                                                                                               | 1                              | 2,0                |
| Romania                                                                                                                                              | 1                              | 2,0                |
| Total                                                                                                                                                | 50                             | 100,0              |
|                                                                                                                                                      |                                |                    |
| B. Does your hospital screen ALL mothers for Group B Streptococcus (GBS) colonization at 35-37 weeks of gestation?: <b>ONLY FOR SELECTED MOTHERS</b> |                                |                    |
| <b>Country</b>                                                                                                                                       | <b>Number of responses (n)</b> | <b>Percent (%)</b> |
| Bulgaria                                                                                                                                             | 6                              | 10,5               |
| Sweden                                                                                                                                               | 6                              | 10,5               |
| Greece                                                                                                                                               | 5                              | 8,8                |
| Estonia                                                                                                                                              | 4                              | 7,0                |
| Israel                                                                                                                                               | 4                              | 7,0                |
| Netherlands                                                                                                                                          | 4                              | 7,0                |
| Romania                                                                                                                                              | 4                              | 7,0                |
| Russia                                                                                                                                               | 3                              | 5,3                |
| Turkey                                                                                                                                               | 3                              | 5,3                |
| United Kingdom                                                                                                                                       | 3                              | 5,3                |
| Denmark                                                                                                                                              | 2                              | 3,5                |
| Norway                                                                                                                                               | 2                              | 3,5                |
| Albania                                                                                                                                              | 1                              | 1,8                |
| Austria                                                                                                                                              | 1                              | 1,8                |
| Belarus                                                                                                                                              | 1                              | 1,8                |
| Bosnia and Herzegovina                                                                                                                               | 1                              | 1,8                |

| Cyprus                                                                                                                         | 1                       | 1,8         |
|--------------------------------------------------------------------------------------------------------------------------------|-------------------------|-------------|
| France                                                                                                                         | 1                       | 1,8         |
| Germany                                                                                                                        | 1                       | 1,8         |
| Hungary                                                                                                                        | 1                       | 1,8         |
| Ireland                                                                                                                        | 1                       | 1,8         |
| Portugal                                                                                                                       | 1                       | 1,8         |
| Serbia                                                                                                                         | 1                       | 1,8         |
| Total                                                                                                                          | 57                      | 100,0       |
|                                                                                                                                |                         |             |
| C. Does your hospital screen ALL mothers for Group B Streptococcus (GBS) colonization at 35-37 weeks of gestation?: <b>YES</b> |                         |             |
| Country                                                                                                                        | Number of responses (n) | Percent (%) |
| Italy                                                                                                                          | 41                      | 25,0        |
| France                                                                                                                         | 19                      | 11,6        |
| Belgium                                                                                                                        | 17                      | 10,4        |
| Portugal                                                                                                                       | 15                      | 9,1         |
| Spain                                                                                                                          | 14                      | 8,5         |
| Poland                                                                                                                         | 11                      | 6,7         |
| Czech Republic                                                                                                                 | 8                       | 4,9         |
| Switzerland                                                                                                                    | 5                       | 3,0         |
| Austria                                                                                                                        | 4                       | 2,4         |
| Germany                                                                                                                        | 4                       | 2,4         |
| Denmark                                                                                                                        | 3                       | 1,8         |
| Hungary                                                                                                                        | 3                       | 1,8         |
| Bulgaria                                                                                                                       | 2                       | 1,2         |
| Finland                                                                                                                        | 2                       | 1,2         |
| Latvia                                                                                                                         | 2                       | 1,2         |
| Lithuania                                                                                                                      | 2                       | 1,2         |
| Bosnia and Herzegovina                                                                                                         | 1                       | ,6          |
| Croatia                                                                                                                        | 1                       | ,6          |
| Estonia                                                                                                                        | 1                       | ,6          |
| Greece                                                                                                                         | 1                       | ,6          |
| Montenegro                                                                                                                     | 1                       | ,6          |
| Netherlands                                                                                                                    | 1                       | ,6          |
| North Macedonia                                                                                                                | 1                       | ,6          |
| Norway                                                                                                                         | 1                       | ,6          |
| Russia                                                                                                                         | 1                       | ,6          |
| Slovakia                                                                                                                       | 1                       | ,6          |
| Slovenia                                                                                                                       | 1                       | ,6          |
| United Kingdom                                                                                                                 | 1                       | ,6          |
| Total                                                                                                                          | 164                     | 100,0       |
