# Supplementary material for: Variations in Antibiotic Use and Sepsis Management in Neonatal Intensive Care Units: A European Survey
Source: MDPI journal article supplement (doi:10.3390/antibiotics10091046), 2021-08-27
Supplement: s1 [file Suppl S5.pdf › Suppl S5.pdf]

| Supplemental material S5. Summary of questionnaire |                                                                                                                                      |                                                                                                                                                                                                                                                                                                                                                                                                |
|----------------------------------------------------|--------------------------------------------------------------------------------------------------------------------------------------|------------------------------------------------------------------------------------------------------------------------------------------------------------------------------------------------------------------------------------------------------------------------------------------------------------------------------------------------------------------------------------------------|
| Q1                                                 | In which country is your hospital located?                                                                                           | Country                                                                                                                                                                                                                                                                                                                                                                                        |
| Q2                                                 | How would you classify the level of care in your neonatology unit?                                                                   | Level 1 Neonatal Unit (look after healthy newborns but are relatively stable and mature)<br>Level 2 Neonatal Unit (look after babies who need more advanced support like TPN, CPAP, brief CMV...)<br>Level 3 NICU (look after the most premature and unwell babies)<br>Level 3 NICU with neonatal surgery, cardiac surgery or neurosurgery<br>Mixed pediatric and neonatal intensive care unit |
| Q4                                                 | In your unit, do you care for premature newborns under 28 weeks until discharge?                                                     | Yes<br>No                                                                                                                                                                                                                                                                                                                                                                                      |
| Q5                                                 | How many NEONATAL ADMISSIONS of babies did you have in 2020? (in numbers please)                                                     | Number                                                                                                                                                                                                                                                                                                                                                                                         |
| Q6                                                 | How many ADMISSIONS of babies < 1500 gr did you have in 2020?                                                                        | Less than 30<br>Between 30 and 50<br>More than 50                                                                                                                                                                                                                                                                                                                                              |
| Q7                                                 | How many intensive care beds / incubators do you have in your unit? (in numbers please)                                              | Number                                                                                                                                                                                                                                                                                                                                                                                         |
| Q8                                                 | Does your neonatal unit has a written antibiotic GUIDELINE to treat empirically EARLY ONSET NEONATAL SEPSIS?                         | Yes<br>No                                                                                                                                                                                                                                                                                                                                                                                      |
| Q9                                                 | If your answer to the previous question is YES, how would you describe the level of adherence to the GUIDELINE?                      | Very low<br>Low<br>Intermediate<br>High<br>Very high                                                                                                                                                                                                                                                                                                                                           |
| Q10                                                | Does your neonatal unit has a written antibiotic GUIDELINE to treat empirically LATE ONSET NEONATAL SEPSIS?                          | Yes<br>No                                                                                                                                                                                                                                                                                                                                                                                      |
| Q11                                                | If your answer to the previous question is YES, how would you describe the level of adherence to the GUIDELINE?                      | Very low<br>Low<br>Intermediate<br>High<br>Very high                                                                                                                                                                                                                                                                                                                                           |
| Q12                                                | Does your neonatal unit has a written antibiotic GUIDELINE to STOP treatment in NEONATAL SEPSIS?                                     | Yes<br>No                                                                                                                                                                                                                                                                                                                                                                                      |
| Q13                                                | If your answer to the previous question is YES, how would you describe the level of adherence to the GUIDELINE?                      | Very low<br>Low<br>Intermediate<br>High<br>Very high                                                                                                                                                                                                                                                                                                                                           |
| Q14                                                | Does your MATERNITY unit has a written antibiotic stewardship to IDENTIFY and TREAT MOTHERS with risk of perinatal infection?        | Yes<br>No                                                                                                                                                                                                                                                                                                                                                                                      |
| Q15                                                | If your answer to the previous question is YES, how would you describe the level of adherence to the GUIDELINE?                      | Very low<br>Low<br>Intermediate<br>High<br>Very high                                                                                                                                                                                                                                                                                                                                           |
| Q16                                                | Does your hospital screen ALL mothers for Group B Streptococcus (GBS) colonization at 35-37 weeks of gestation?                      | Yes<br>No<br>Only for selected mothers                                                                                                                                                                                                                                                                                                                                                         |
| Q17                                                | Does your neonatal unit uses any tool (like Kaiser Permanente Early Onset Sepsis) to predict the risk of microbiologically confirmed | Yes<br>No                                                                                                                                                                                                                                                                                                                                                                                      |

|     |                                                                                                                                                             |                                                                                                                                                                                                                                                           |
|-----|-------------------------------------------------------------------------------------------------------------------------------------------------------------|-----------------------------------------------------------------------------------------------------------------------------------------------------------------------------------------------------------------------------------------------------------|
|     | infection in order to reduce unnecessary investigations and antibiotic therapy with some success?                                                           | Only sometimes, depending on the neonatologist                                                                                                                                                                                                            |
| Q18 | Which is your initial EMPIRIC therapy for EARLY ONSET NEONATAL SEPSIS? Could you specify the dose regime for the selected antibiotics in the last text box? | Penicillin<br>Ampicillin<br>Gentamicin<br>Tobramycin<br>Amikacin<br>Cefotaxime<br>Ceftazidime<br>Meropenem<br>Vancomycin<br>Nafcillin<br>Metronidazole<br>Piperacillin-tazobactam<br>Teicoplanin<br>Flucloxacillin<br>Oxacillin<br>Other (please specify) |
| Q19 | Which is your initial EMPIRIC therapy for LATE ONSET NEONATAL SEPSIS? Could you specify the dose regime for the selected antibiotics in the last text box?  | Penicillin<br>Ampicillin<br>Gentamicin<br>Tobramycin<br>Amikacin<br>Cefotaxime<br>Ceftazidime<br>Meropenem<br>Vancomycin<br>Nafcillin<br>Metronidazole<br>Piperacillin-tazobactam<br>Teicoplanin<br>Flucloxacillin<br>Oxacillin<br>Other (please specify) |
| Q20 | Which is your initial EMPIRIC therapy for babies with Necrotizing Enterocolitis (NEC)?                                                                      | Penicillin<br>Ampicillin<br>Gentamicin<br>Tobramycin<br>Amikacin<br>Cefotaxime<br>Ceftazidime<br>Meropenem<br>Vancomycin<br>Nafcillin<br>Metronidazole<br>Piperacillin-tazobactam<br>Teicoplanin<br>Flucloxacillin<br>Other (please specify)              |
| Q21 | Does your Neonatal Unit perform TDM (Therapeutic Drug Monitoring) as per local/national guidelines, always that you prescribe...?                           | Gentamycin<br>Tobramycin<br>Vancomycin<br>Teicoplanin<br>Amikacin<br>Never<br>Other (please specify)                                                                                                                                                      |

|     |                                                                                                                                                       |                                                                                                                                                                                                                                                                                                                                                                                                              |
|-----|-------------------------------------------------------------------------------------------------------------------------------------------------------|--------------------------------------------------------------------------------------------------------------------------------------------------------------------------------------------------------------------------------------------------------------------------------------------------------------------------------------------------------------------------------------------------------------|
| Q22 | Which markers do you routinely use in your neonatal unit for the DIAGNOSIS and MONITORING of neonatal infections?                                     | C reactive protein<br>Procalcitonin<br>Cytokines<br>PCR based methods<br>DNA microarray-based methods<br>Blood culture<br>HeRo monitoring (heart rate variability monitoring)<br>Other (please specify)                                                                                                                                                                                                      |
| Q23 | Which markers do you really routinely use in your NICU to STOP your antibiotics in neonatal infections?                                               | C reactive protein<br>Procalcitonin<br>Cytokines<br>PCR based methods<br>DNA microarray-based methods<br>Blood culture<br>HeRo monitoring (heart rate variability monitoring)<br>Other (please specify)                                                                                                                                                                                                      |
| Q24 | What is your usual practice regarding the decision to perform a lumbar puncture and analyze CSF (cerebrospinal fluid) in a CLINICALLY SEPTIC newborn? | I always perform a lumbar puncture if the newborn is clinically stable<br>I decide to perform a lumbar puncture, based on the patients' history, risk factors, clinical features...<br>I decide to perform a lumbar puncture depending on blood markers (CRP, for example)<br>I decide to perform a lumbar puncture depending on the positivity or negativity of the blood culture<br>Other (please specify) |
| Q25 | Do you use ORAL antibiotics in newborns admitted in your NICU?                                                                                        | Yes<br>No                                                                                                                                                                                                                                                                                                                                                                                                    |
| Q26 | If your answer is YES to the previous question, could you explain in which clinical situation you would use them?                                     | In case of limited vascular access<br>As a prophylactic treatment for babies at risk of infection<br>As an optional treatment for mild infections<br>Other (please specify)                                                                                                                                                                                                                                  |
| Q27 | Do you use FUNGAL prophylaxis in your VLBW preterm babies?                                                                                            | Yes<br>No                                                                                                                                                                                                                                                                                                                                                                                                    |
| Q28 | Which regimen of IV FLUCONAZOLE do you normally use as prophylaxis in your preterm babies?                                                            | Free text                                                                                                                                                                                                                                                                                                                                                                                                    |
| Q29 | Do you normally swap to ORAL NYSTATIN when your preterm baby is on MINIMAL ENTERAL FEEDING? If not, when?                                             | Free text                                                                                                                                                                                                                                                                                                                                                                                                    |
